# Supplementary material for: Comprehensive analysis of necroptosis-related genes in renal ischemia-reperfusion injury
Source: Front Immunol. 2023 Oct 27;14:1279603. doi: 10.3389/fimmu.2023.1279603 (PMC10641517; doi:10.3389/fimmu.2023.1279603)
Supplement: Supplementary file 5 [file Table_1.xlsx]

## Sheet: Summary
Table S1	Detailed information of the datasets used in this study.
Table S2	Total necroptosis-related genes obtained from the GeneCards database with a relevance score>1.
Table S3	Primer sequences of the hub genes.

## Sheet: S1
Table S1. Detailed information of the datasets used in this study.
Dataset	Organsim and Tissue	Pre-retrieval (n)	Post-reperfusion (n)	Total (n)	Platform	Experiment Type	Sample Acquisition Time Points	Details
GSE43974	Homo sapiens; Kidney biopsy	188	203	391	GPL10558	Bulk RNA-Seq	Pre-retrieval samples: between brain death period and organ retieval for DBD donors, between cardiac arrest and organ retrieval for DCD donors, and before clamping the renal artery for kidneys from living donors; Post-reperfusion samples: 45 to 60min after reperfusion	Including living donor (n=71), brain-dead donor (n=206), and deceased cardiac dead donor (n=114) samples.
GSE126805	Homo sapiens; Kidney biopsy	41	42	83	GPL21290	Bulk RNA-Seq	Pre-retrieval samples: before implantation (kidney flushed and stored on ice); Post-reperfusion samples: the end of surgical procedure
GSE171639	Mus musculus; Whole kidney	1	1	2	GPL24247	Single cell RNA-Seq	Mice were subjected to bilateral clamping of the renal pedicle for 30 minutes, and bilateral kidney was removed after 6-7 hours of reperfusion.
GSE193649	Mus musculus; Section of the middle part of the left kidney	3	3	2	GPL21626	Single cell RNA-Seq	For IR surgery, the left renal artery was clamped for 27 min and was harvested after 7 days.
Abbreviations	DBD: donation after brain death; DCD: donation after cardiac death; RNA-seq: RNA sequencing; IR: ischemia-reperfusion.

## Sheet: S2
Table S2. Total necroptosis-related genes obtained from the GeneCards database with a relevance score>1.
Gene Symbol	Description	Category	Gifts	GC Id	Relevance score	GeneCards Link
RIPK1	Receptor Interacting Serine/Threonine Kinase 1	Protein Coding	56	GC06P003333	20.1213	https://www.genecards.org/cgi-bin/carddisp.pl?gene=RIPK1
RIPK3	Receptor Interacting Serine/Threonine Kinase 3	Protein Coding	50	GC14M024336	17.307	https://www.genecards.org/cgi-bin/carddisp.pl?gene=RIPK3
MLKL	Mixed Lineage Kinase Domain Like Pseudokinase	Protein Coding	49	GC16M074672	16.8215	https://www.genecards.org/cgi-bin/carddisp.pl?gene=MLKL
ZBP1	Z-DNA Binding Protein 1	Protein Coding	47	GC20M057603	10.8572	https://www.genecards.org/cgi-bin/carddisp.pl?gene=ZBP1
CASP8	Caspase 8	Protein Coding	59	GC02P201233	7.48072	https://www.genecards.org/cgi-bin/carddisp.pl?gene=CASP8
TNF	Tumor Necrosis Factor	Protein Coding	59	GC06P092154	4.94142	https://www.genecards.org/cgi-bin/carddisp.pl?gene=TNF
CYLD	CYLD Lysine 63 Deubiquitinase	Protein Coding	55	GC16P050742	4.04621	https://www.genecards.org/cgi-bin/carddisp.pl?gene=CYLD
ITPK1	Inositol-Tetrakisphosphate 1-Kinase	Protein Coding	45	GC14M092936	3.61772	https://www.genecards.org/cgi-bin/carddisp.pl?gene=ITPK1
IPMK	Inositol Polyphosphate Multikinase	Protein Coding	43	GC10M058191	3.61772	https://www.genecards.org/cgi-bin/carddisp.pl?gene=IPMK
MAP3K7	Mitogen-Activated Protein Kinase Kinase Kinase 7	Protein Coding	57	GC06M090513	3.1912	https://www.genecards.org/cgi-bin/carddisp.pl?gene=MAP3K7
CASP6	Caspase 6	Protein Coding	55	GC04M109688	3.08368	https://www.genecards.org/cgi-bin/carddisp.pl?gene=CASP6
TRPM7	Transient Receptor Potential Cation Channel Subfamily M Member 7	Protein Coding	50	GC15M050552	3.03861	https://www.genecards.org/cgi-bin/carddisp.pl?gene=TRPM7
FADD	Fas Associated Via Death Domain	Protein Coding	52	GC11P070203	2.74959	https://www.genecards.org/cgi-bin/carddisp.pl?gene=FADD
PELI1	Pellino E3 Ubiquitin Protein Ligase 1	Protein Coding	48	GC02M064092	2.68334	https://www.genecards.org/cgi-bin/carddisp.pl?gene=PELI1
PGLYRP1	Peptidoglycan Recognition Protein 1	Protein Coding	48	GC19M070755	2.6135	https://www.genecards.org/cgi-bin/carddisp.pl?gene=PGLYRP1
SPATA2	Spermatogenesis Associated 2	Protein Coding	40	GC20M049903	2.51504	https://www.genecards.org/cgi-bin/carddisp.pl?gene=SPATA2
SIRT3	Sirtuin 3	Protein Coding	54	GC11M000215	2.24839	https://www.genecards.org/cgi-bin/carddisp.pl?gene=SIRT3
TNIP1	TNFAIP3 Interacting Protein 1	Protein Coding	46	GC05M151029	2.22335	https://www.genecards.org/cgi-bin/carddisp.pl?gene=TNIP1
HMGB1	High Mobility Group Box 1	Protein Coding	54	GC13M030456	2.15338	https://www.genecards.org/cgi-bin/carddisp.pl?gene=HMGB1
TP53	Tumor Protein P53	Protein Coding	60	GC17M007661	2.02303	https://www.genecards.org/cgi-bin/carddisp.pl?gene=TP53
TNFRSF1A	TNF Receptor Superfamily Member 1A	Protein Coding	57	GC12M006328	2.02006	https://www.genecards.org/cgi-bin/carddisp.pl?gene=TNFRSF1A
BIRC2	Baculoviral IAP Repeat Containing 2	Protein Coding	53	GC11P102347	1.97134	https://www.genecards.org/cgi-bin/carddisp.pl?gene=BIRC2
MEFV	MEFV Innate Immunity Regulator, Pyrin	Protein Coding	51	GC16M008228	1.94632	https://www.genecards.org/cgi-bin/carddisp.pl?gene=MEFV
AIM2	Absent In Melanoma 2	Protein Coding	48	GC01M159062	1.94632	https://www.genecards.org/cgi-bin/carddisp.pl?gene=AIM2
TNFAIP3	TNF Alpha Induced Protein 3	Protein Coding	55	GC06P137866	1.86209	https://www.genecards.org/cgi-bin/carddisp.pl?gene=TNFAIP3
UCHL1	Ubiquitin C-Terminal Hydrolase L1	Protein Coding	59	GC04P041256	1.84545	https://www.genecards.org/cgi-bin/carddisp.pl?gene=UCHL1
STING1	Stimulator Of Interferon Response CGAMP Interactor 1	Protein Coding	48	GC05M139476	1.81052	https://www.genecards.org/cgi-bin/carddisp.pl?gene=STING1
SERTAD1	SERTA Domain Containing 1	Protein Coding	40	GC19M040421	1.773	https://www.genecards.org/cgi-bin/carddisp.pl?gene=SERTAD1
TRAF2	TNF Receptor Associated Factor 2	Protein Coding	51	GC09P136881	1.76267	https://www.genecards.org/cgi-bin/carddisp.pl?gene=TRAF2
NFKB1	Nuclear Factor Kappa B Subunit 1	Protein Coding	60	GC04P102501	1.75306	https://www.genecards.org/cgi-bin/carddisp.pl?gene=NFKB1
CFLAR	CASP8 And FADD Like Apoptosis Regulator	Protein Coding	51	GC02P201122	1.73165	https://www.genecards.org/cgi-bin/carddisp.pl?gene=CFLAR
CTSB	Cathepsin B	Protein Coding	59	GC08M011842	1.71025	https://www.genecards.org/cgi-bin/carddisp.pl?gene=CTSB
MAPK14	Mitogen-Activated Protein Kinase 14	Protein Coding	58	GC06P092286	1.71025	https://www.genecards.org/cgi-bin/carddisp.pl?gene=MAPK14
FAS	Fas Cell Surface Death Receptor	Protein Coding	57	GC10P094616	1.69884	https://www.genecards.org/cgi-bin/carddisp.pl?gene=FAS
LINC03054	Long Intergenic Non-Protein Coding RNA 3054	RNA Gene	13	GC08P048619	1.64461	https://www.genecards.org/cgi-bin/carddisp.pl?gene=LINC03054
CAMTA1-AS3	CAMTA1 Antisense RNA 3	RNA Gene	2	GC01U907111	1.64461	https://www.genecards.org/cgi-bin/carddisp.pl?gene=CAMTA1-AS3
RAB35-AS1	RAB35 Antisense RNA 1	RNA Gene	2	GC12U903548	1.64461	https://www.genecards.org/cgi-bin/carddisp.pl?gene=RAB35-AS1
SLC39A13-AS1	SLC39A13 Antisense RNA 1	RNA Gene	2	GC11U903807	1.64461	https://www.genecards.org/cgi-bin/carddisp.pl?gene=SLC39A13-AS1
AIFM1	Apoptosis Inducing Factor Mitochondria Associated 1	Protein Coding	56	GC0XM130129	1.62639	https://www.genecards.org/cgi-bin/carddisp.pl?gene=AIFM1
KLHDC10	Kelch Domain Containing 10	Protein Coding	39	GC07P130070	1.5872	https://www.genecards.org/cgi-bin/carddisp.pl?gene=KLHDC10
SFTPA1	Surfactant Protein A1	Protein Coding	51	GC10P095475	1.56364	https://www.genecards.org/cgi-bin/carddisp.pl?gene=SFTPA1
GSK3B	Glycogen Synthase Kinase 3 Beta	Protein Coding	57	GC03M119821	1.53883	https://www.genecards.org/cgi-bin/carddisp.pl?gene=GSK3B
TRADD	TNFRSF1A Associated Via Death Domain	Protein Coding	48	GC16M067154	1.53358	https://www.genecards.org/cgi-bin/carddisp.pl?gene=TRADD
XIAP	X-Linked Inhibitor Of Apoptosis	Protein Coding	59	GC0XP123859	1.49605	https://www.genecards.org/cgi-bin/carddisp.pl?gene=XIAP
ADAR	Adenosine Deaminase RNA Specific	Protein Coding	52	GC01M154599	1.47878	https://www.genecards.org/cgi-bin/carddisp.pl?gene=ADAR
MYC	MYC Proto-Oncogene, BHLH Transcription Factor	Protein Coding	59	GC08P127735	1.47612	https://www.genecards.org/cgi-bin/carddisp.pl?gene=MYC
TNIP3	TNFAIP3 Interacting Protein 3	Protein Coding	43	GC04M121131	1.47612	https://www.genecards.org/cgi-bin/carddisp.pl?gene=TNIP3
TLR4	Toll Like Receptor 4	Protein Coding	58	GC09P117704	1.45525	https://www.genecards.org/cgi-bin/carddisp.pl?gene=TLR4
GJB1	Gap Junction Protein Beta 1	Protein Coding	53	GC0XP071212	1.45525	https://www.genecards.org/cgi-bin/carddisp.pl?gene=GJB1
DNM1L	Dynamin 1 Like	Protein Coding	54	GC12P032679	1.43331	https://www.genecards.org/cgi-bin/carddisp.pl?gene=DNM1L
PTGES3	Prostaglandin E Synthase 3	Protein Coding	51	GC12M057070	1.43331	https://www.genecards.org/cgi-bin/carddisp.pl?gene=PTGES3
UVRAG	UV Radiation Resistance Associated	Protein Coding	48	GC11P075815	1.43331	https://www.genecards.org/cgi-bin/carddisp.pl?gene=UVRAG
MIR324	MicroRNA 324	RNA Gene	23	GC17M007223	1.43331	https://www.genecards.org/cgi-bin/carddisp.pl?gene=MIR324
SIRT2	Sirtuin 2	Protein Coding	55	GC19M038878	1.43301	https://www.genecards.org/cgi-bin/carddisp.pl?gene=SIRT2
MYD88	MYD88 Innate Immune Signal Transduction Adaptor	Protein Coding	56	GC03P038152	1.41011	https://www.genecards.org/cgi-bin/carddisp.pl?gene=MYD88
JUN	Jun Proto-Oncogene, AP-1 Transcription Factor Subunit	Protein Coding	55	GC01M058780	1.41011	https://www.genecards.org/cgi-bin/carddisp.pl?gene=JUN
BRD4	Bromodomain Containing 4	Protein Coding	55	GC19M015236	1.38541	https://www.genecards.org/cgi-bin/carddisp.pl?gene=BRD4
RB1	RB Transcriptional Corepressor 1	Protein Coding	55	GC13P048303	1.38541	https://www.genecards.org/cgi-bin/carddisp.pl?gene=RB1
AREL1	Apoptosis Resistant E3 Ubiquitin Protein Ligase 1	Protein Coding	43	GC14M074653	1.37308	https://www.genecards.org/cgi-bin/carddisp.pl?gene=AREL1
IKBKB	Inhibitor Of Nuclear Factor Kappa B Kinase Subunit Beta	Protein Coding	61	GC08P042271	1.35888	https://www.genecards.org/cgi-bin/carddisp.pl?gene=IKBKB
DAPK1	Death Associated Protein Kinase 1	Protein Coding	56	GC09P087497	1.35888	https://www.genecards.org/cgi-bin/carddisp.pl?gene=DAPK1
FKBP1A	FKBP Prolyl Isomerase 1A	Protein Coding	54	GC20M001369	1.35888	https://www.genecards.org/cgi-bin/carddisp.pl?gene=FKBP1A
CD274	CD274 Molecule	Protein Coding	52	GC09P005450	1.35888	https://www.genecards.org/cgi-bin/carddisp.pl?gene=CD274
MIR425	MicroRNA 425	RNA Gene	22	GC03M051544	1.35888	https://www.genecards.org/cgi-bin/carddisp.pl?gene=MIR425
EZH2	Enhancer Of Zeste 2 Polycomb Repressive Complex 2 Subunit	Protein Coding	60	GC07M148807	1.33003	https://www.genecards.org/cgi-bin/carddisp.pl?gene=EZH2
NFE2L2	NFE2 Like BZIP Transcription Factor 2	Protein Coding	57	GC02M177227	1.33003	https://www.genecards.org/cgi-bin/carddisp.pl?gene=NFE2L2
CHMP4B	Charged Multivesicular Body Protein 4B	Protein Coding	49	GC20P034119	1.33003	https://www.genecards.org/cgi-bin/carddisp.pl?gene=CHMP4B
CXCL5	C-X-C Motif Chemokine Ligand 5	Protein Coding	47	GC04M073995	1.33003	https://www.genecards.org/cgi-bin/carddisp.pl?gene=CXCL5
MIR29B1	MicroRNA 29b-1	RNA Gene	23	GC07M130877	1.33003	https://www.genecards.org/cgi-bin/carddisp.pl?gene=MIR29B1
BCL2	BCL2 Apoptosis Regulator	Protein Coding	57	GC18M063123	1.32794	https://www.genecards.org/cgi-bin/carddisp.pl?gene=BCL2
AXL	AXL Receptor Tyrosine Kinase	Protein Coding	59	GC19P041219	1.29811	https://www.genecards.org/cgi-bin/carddisp.pl?gene=AXL
MERTK	MER Proto-Oncogene, Tyrosine Kinase	Protein Coding	59	GC02P111898	1.29811	https://www.genecards.org/cgi-bin/carddisp.pl?gene=MERTK
TYRO3	TYRO3 Protein Tyrosine Kinase	Protein Coding	56	GC15P041557	1.29811	https://www.genecards.org/cgi-bin/carddisp.pl?gene=TYRO3
SIRT6	Sirtuin 6	Protein Coding	52	GC19M004174	1.29811	https://www.genecards.org/cgi-bin/carddisp.pl?gene=SIRT6
SLC39A7	Solute Carrier Family 39 Member 7	Protein Coding	50	GC06P033200	1.29811	https://www.genecards.org/cgi-bin/carddisp.pl?gene=SLC39A7
NAT2	N-Acetyltransferase 2	Protein Coding	47	GC08P018391	1.29811	https://www.genecards.org/cgi-bin/carddisp.pl?gene=NAT2
USP22	Ubiquitin Specific Peptidase 22	Protein Coding	47	GC17M020999	1.29811	https://www.genecards.org/cgi-bin/carddisp.pl?gene=USP22
PANX1	Pannexin 1	Protein Coding	52	GC11P094128	1.26188	https://www.genecards.org/cgi-bin/carddisp.pl?gene=PANX1
NAT1	N-Acetyltransferase 1	Protein Coding	50	GC08P018183	1.26188	https://www.genecards.org/cgi-bin/carddisp.pl?gene=NAT1
PDCD6IP	Programmed Cell Death 6 Interacting Protein	Protein Coding	50	GC03P033798	1.26188	https://www.genecards.org/cgi-bin/carddisp.pl?gene=PDCD6IP
FLOT1	Flotillin 1	Protein Coding	47	GC06M071649	1.26188	https://www.genecards.org/cgi-bin/carddisp.pl?gene=FLOT1
FLOT2	Flotillin 2	Protein Coding	47	GC17M051195	1.26188	https://www.genecards.org/cgi-bin/carddisp.pl?gene=FLOT2
IL37	Interleukin 37	Protein Coding	46	GC02P123799	1.26188	https://www.genecards.org/cgi-bin/carddisp.pl?gene=IL37
DIABLO	Diablo IAP-Binding Mitochondrial Protein	Protein Coding	53	GC12M122497	1.24785	https://www.genecards.org/cgi-bin/carddisp.pl?gene=DIABLO
FASN	Fatty Acid Synthase	Protein Coding	55	GC17M082078	1.21891	https://www.genecards.org/cgi-bin/carddisp.pl?gene=FASN
HNRNPA1	Heterogeneous Nuclear Ribonucleoprotein A1	Protein Coding	55	GC12P054280	1.21891	https://www.genecards.org/cgi-bin/carddisp.pl?gene=HNRNPA1
CDK9	Cyclin Dependent Kinase 9	Protein Coding	53	GC09P128100	1.21891	https://www.genecards.org/cgi-bin/carddisp.pl?gene=CDK9
TIMM50	Translocase Of Inner Mitochondrial Membrane 50	Protein Coding	45	GC19P039480	1.21891	https://www.genecards.org/cgi-bin/carddisp.pl?gene=TIMM50
SLC25A37	Solute Carrier Family 25 Member 37	Protein Coding	44	GC08P023528	1.21891	https://www.genecards.org/cgi-bin/carddisp.pl?gene=SLC25A37
PPP1R3G	Protein Phosphatase 1 Regulatory Subunit 3G	Protein Coding	38	GC06P005085	1.21891	https://www.genecards.org/cgi-bin/carddisp.pl?gene=PPP1R3G
MIR7-1	MicroRNA 7-1	RNA Gene	19	GC09M096204	1.21891	https://www.genecards.org/cgi-bin/carddisp.pl?gene=MIR7-1
NFKBIA	NFKB Inhibitor Alpha	Protein Coding	57	GC14M035401	1.16291	https://www.genecards.org/cgi-bin/carddisp.pl?gene=NFKBIA
AURKC	Aurora Kinase C	Protein Coding	54	GC19P073588	1.16291	https://www.genecards.org/cgi-bin/carddisp.pl?gene=AURKC
NGFR	Nerve Growth Factor Receptor	Protein Coding	54	GC17P049495	1.16291	https://www.genecards.org/cgi-bin/carddisp.pl?gene=NGFR
FMR1	Fragile X Messenger Ribonucleoprotein 1	Protein Coding	51	GC0XP147956	1.16291	https://www.genecards.org/cgi-bin/carddisp.pl?gene=FMR1
GNLY	Granulysin	Protein Coding	44	GC02P085685	1.13674	https://www.genecards.org/cgi-bin/carddisp.pl?gene=GNLY
PARP1	Poly(ADP-Ribose) Polymerase 1	Protein Coding	58	GC01M226360	1.09613	https://www.genecards.org/cgi-bin/carddisp.pl?gene=PARP1
HTRA2	HtrA Serine Peptidase 2	Protein Coding	52	GC02P074529	1.09613	https://www.genecards.org/cgi-bin/carddisp.pl?gene=HTRA2
HSPA5	Heat Shock Protein Family A (Hsp70) Member 5	Protein Coding	55	GC09M125234	1.07419	https://www.genecards.org/cgi-bin/carddisp.pl?gene=HSPA5
BIRC3	Baculoviral IAP Repeat Containing 3	Protein Coding	53	GC11P102317	1.07419	https://www.genecards.org/cgi-bin/carddisp.pl?gene=BIRC3
PRKAA2	Protein Kinase AMP-Activated Catalytic Subunit Alpha 2	Protein Coding	57	GC01P056645	1.051	https://www.genecards.org/cgi-bin/carddisp.pl?gene=PRKAA2
PRKAA1	Protein Kinase AMP-Activated Catalytic Subunit Alpha 1	Protein Coding	54	GC05M040759	1.051	https://www.genecards.org/cgi-bin/carddisp.pl?gene=PRKAA1
PITPNA	Phosphatidylinositol Transfer Protein Alpha	Protein Coding	47	GC17M006732	1.051	https://www.genecards.org/cgi-bin/carddisp.pl?gene=PITPNA
ANGPT2	Angiopoietin 2	Protein Coding	55	GC08M006499	1.02771	https://www.genecards.org/cgi-bin/carddisp.pl?gene=ANGPT2
METTL3	Methyltransferase 3, N6-Adenosine-Methyltransferase Complex Catalytic Subunit	Protein Coding	48	GC14M021498	1.02771	https://www.genecards.org/cgi-bin/carddisp.pl?gene=METTL3
TRAF5	TNF Receptor Associated Factor 5	Protein Coding	47	GC01P211326	1.02771	https://www.genecards.org/cgi-bin/carddisp.pl?gene=TRAF5
FNDC4	Fibronectin Type III Domain Containing 4	Protein Coding	42	GC02M027491	1.02771	https://www.genecards.org/cgi-bin/carddisp.pl?gene=FNDC4
FNDC5	Fibronectin Type III Domain Containing 5	Protein Coding	42	GC01M033245	1.02771	https://www.genecards.org/cgi-bin/carddisp.pl?gene=FNDC5
FASLG	Fas Ligand	Protein Coding	55	GC01P172628	1.0263	https://www.genecards.org/cgi-bin/carddisp.pl?gene=FASLG
PRKN	Parkin RBR E3 Ubiquitin Protein Ligase	Protein Coding	53	GC06M161348	1.0263	https://www.genecards.org/cgi-bin/carddisp.pl?gene=PRKN
TXN	Thioredoxin	Protein Coding	52	GC09M110243	1.0263	https://www.genecards.org/cgi-bin/carddisp.pl?gene=TXN
RALBP1	RalA Binding Protein 1	Protein Coding	51	GC18P009465	1.0263	https://www.genecards.org/cgi-bin/carddisp.pl?gene=RALBP1
TP53I3	Tumor Protein P53 Inducible Protein 3	Protein Coding	47	GC02M024078	1.0263	https://www.genecards.org/cgi-bin/carddisp.pl?gene=TP53I3
GSDMD	Gasdermin D	Protein Coding	45	GC08P143553	1.0263	https://www.genecards.org/cgi-bin/carddisp.pl?gene=GSDMD

## Sheet: S3
Table S3. Primer sequences of the hub genes.
Gene Symbol	Forward sequence (5' to 3')	Reverse sequence (5' to 3')
TNFAIP3	GCGGCCACAGAAAACACTC	CTCCCAATGGTCAAGGCATC
JUN	TTCCTCCAGTCCGAGAGCG	TGAGAAGGTCCGAGTTCTTGG
SERTAD1	GTGCCTTGGACTTGCTAGG	TCACTGTCGTACATGGAGGTATC
NFKBIA	TGAAGGACGAGGAGTACGAGC	TGCAGGAACGAGTCTCCGT
MYC	ATGCCCCTCAACGTGAACTTC	GTCGCAGATGAAATAGGGCTG
